# Supplementary material for: Hybrid Transshipment Policy and Ordering Model for Multiple Periods with Customer Switching Behaviour
Source: Hindawi journal article supplement (doi:10.1155/2021/5996579), 2021-12-20
Supplement: f1 [file 5996579.f1.docx]

**Appendix: Proofs**

**Proof of Theorem 1**

The proof is completed by induction. Without loss of generality, we take retailer 1 as an example to analyze. Now, we consider four cases, respectively. Therefore, at the period , and when the inventory level holds, we obtain the equality. When the inventory level holds, we can prove the inequality

holds. When

, then holds. When , . Therefore, the conclusion is established at the periods. Then the induction can start from . For an arbitraryperiod, we assume the induction hypothesis holds. Assume at the period, when, the inequality

holds. The inequality follows directly from the inductive hypothesis. When , the inequality

holds. The inequality follows directly from the inductive hypothesis .When , the inequality

holds. The inequality follows directly from the inductive hypothesis. When , the inequality holds. Therefore, the proof is completed.

**Proof of Theorem 2**

Generally, we take retailer 1 as an example to analyze. The proof is done by induction on and *.* To better understand this trade-off, we define the expression , which denotes the marginal benefit of keeping an extra unit of inventory at retailer 1 when . When , we need to show the inequality holds. Therefore, when , the inequality holds. To complete the proof, we give inductive hypothesis that is non-increasing in at period , i.e., the inequality holds. At period , we will show the inequality holds.

.

The first term, i.e., , follows directly from the inductive hypothesis. The second term holds from the four inequalities [1].

,,,Four inequalities follow directly from the inductive hypothesis. The proof of the third term can be done in a similar way. So, we conclude holds.

Next, we will show holds for in a similar way. When , the inequality holds. At period , we will show the inequality holds.

The first term, i.e., , follows directly from the inductive hypothesis. The second term holds from the next four inequalities [1].

,,,.

The first inequality holds the following from . The second inequality can be written by inequality . Therefore, the second inequality holds. The third one holds following from the inequality and the inequality . The fourth one holds following from the inequality and the inequality . The proof of the third term can be done in a similar way. Therefore, is non-increasing in at period .

Next, we will use induction to prove for . When , holds. This hypothesis holds for as . To complete the proof, the inductive hypothesis is given that is non-decreasing in period , i.e., the inequality holds. At period , we will show the inequality holds.

.

The first term, i.e., , follows directly from the inductive hypothesis. The second and third term hold from [1]. Therefore, is non-decreasing in period. Since is non-decreasing in period and non-increasing in , the inequality can be easily showed.

The inequality can be easily shown. Then the request of retailer 2 is accepted if and only if holds. That is to say, the inequality must hold. Therefore, there exists some hold back levels, which ensures the inequality holds. Since is non-decreasing in period and non-increasing in , is non-decreasing in the number of remaining periods. The proof is completed.

**Proof of Theorem 3**

As a general rule, we take retailer 1 as an example to analyze. First, we use the induction to proveholds, that is to say, is nonincreasing in . Now, we consider four cases for retailer1, respectively. Therefore, at the periods, and when , we must show the inequality holds. That is to say, the inequality

when indicator variable , the inequality holds. We obtain . Otherwise, , the inequality holds. We also obtain . When the condition holds, the inequality holds. When the condition holds, holds. When indicator variable , the inequality holds. Otherwise indicator variable . holds. The equality holds. Therefore, the inequality holds. When the condition holds, the inequality holds. Therefore, at the periods, the inequality holds. We assume that

holds at period . At period , we will show the inequality holds. When , we must show the inequality holds.

The first term is rewritten as follows

The first equality is obtained by the following inequality and . The second one is by the inequality . The third one is obtained by the proof of Theorem 2. This completes the proof for the first term.

The second term is rewritten as follows

The first equality is obtained by the assumption in section 4. The second inequality is obtained by Theorem 2. This completes the proof for the second term.

The third term is rewritten as follows

The first equality is obtained by the assumption in section 4. The second one is obtained by the induction hypothesis. This completes the proof for the third term. Therefore, this completes the proof for .

The proof for and can be done in a similar way. When holds,

We can easily show holds if holds, holds if holds, and holds if holds by the induction hypothesis for retailer 2. Therefore, we first assume holds, and then the first term is obtained by the following four inequalities [1].

,

,,.

We further assume , and , then and holds. Therefore, the first term is obtained by the following two inequalities, and

hold. We further assume , , and , then holds. Therefore, the first term is obtained by the following the inequality . When , , , and , then or holds. When holds, the inequality holds as a result of the induction hypothesis. When , holds. The first term is obtained because holds. The proof for the second and third term can be done in a similar way. Therefore, holds.

Meanwhile, the inequality can be shown in a similar way. Therefore, is nonincreasing in and nondecreasing in . The proof of Lemma 1 is completed.

. In addition, . Therefore, there exist some transship-up-to levels for retailer 1. Some transship-down-to levels can be shown in a similar way. The proof is completed.

**Proof of Proposition 1**

Generally, we take retailer 1 as an example to analyze. When holds, regardless of the policy adopted by retailer 2, retailer 1 always chooses to transship in one unit. Therefore, the policy of preventive transshipment is a dominant equilibrium strategy. When the inventory retailers 2 lies in the inventory range , i.e., holds. Considering the policy of retailers 2 and the condition , then retailer 1 tends to transship in one unit, which results in the occurring of preventive transshipment and the higher profit. Otherwise, there will be no preventive transshipment and the profit will remain unchanged. Similarly, when and hold, it is still optimal for retailer in a similar way. Considering three cases of retailer 2: when holds, transshipping in product is one dominant equilibrium strategy for retailer 1. Similarly, when holds, it is a dominant equilibrium strategy to choose to transship out one unit. When holds, it is also a dominant equilibrium strategy. The proof is completed.

**Proof of Proposition 2**

In general, we take retailer 1 as an example to analyze. is nonincreasing in and nondecreasing in from the proof of Theorem 3. By the definition , we can obtain the inequality holds. Sinceis nondecreasing in and hence we can obtain the inequality . Therefore, we obtain . Hence holds. can be shown easily in a similar way. The proof is completed.

**Proof of Theorem 4**

The proof of this theorem is divided into two parts. Firstly, it needs to be proved that the profit function of the retailer is concave in and . Secondly, based on the concave function of the profit function, the existence of the Nash equilibrium will be proved.

As a general rule, we prove that the profit function of retailer 1 is a concave function. When , it is obvious that is concave in . When , the proof is obtained by induction. When , it is easy to prove that is concave in . Further assuming that is concave in , it follows that is a function of the linear and maximum values of , which can be obtained from the equations (1) to (5). Based on the Topkis [2], still retains the concavity in . Similarly, it can be proved that is concave in . The concavity of and that is nonincreasing in and nondecreasing in from Theorem 3 can be proved that has a submodularity property. According to Cachon and Netessine [3], the ordering strategy of at least one of the two retailers arrives at a Nash Equilibrium.

**References**

1. W. Zhuang, M. Z. F. Li, A new method of proving structural properties for certain class of stochastic dynamic control problems. Oper. Res. Let. 38(5),462-467. [https://doi.org/10.1016/j.orl.2010. 05.008](https://doi.org/10.1016/j.orl.2010.%2005.008), 2010.

2. D. M. Topkis, Supermodularity and Complementarity, Princeton University, Princeton, NJ, USA, 1998.

3. G.Cachon, S.Netessine, Game theory in supply chain analysis in handbook of quantitative supply chain analysis: Modeling in the eBusiness Era, Dordrecht: Kluwer, pp. 281–304, 2006.
